# Supplementary material for: Tumour evolvability metrics predict recurrence beyond 10 years in locally-advanced prostate cancer
Source: Research Square preprint supplement (doi:10.21203/rs.3.rs-1520593/v1), 2022-04-05
Supplement: Supplementary file 1 [file 54b53faf86313c30632310dd.docx]

| **Table SX: Statistics associated with Cox Proportional Hazard model presented in Figure 3D.** | | | | | |
| --- | --- | --- | --- | --- | --- |
|  | HR | Lower | Upper | p value | Reference |
| Samples | 0.957 | 0.844 | 1.09 | 0.496 | 0 |
| PSA >20 ng/ml | 2.19 | 1.23 | 3.9 | 0.0077 | PSA ≤ 20 ng/ml |
| Gleason 4 | 0.751 | 0.377 | 1.5 | 0.416 | Gleason 5 |
| Gleason 3 | 0.775 | 0.312 | 1.92 | 0.582 | Gleason 5 |
| Gleason 2 | 0.266 | 0.0569 | 1.24 | 0.0923 | Gleason 5 |
| T3+ | 0.642 | 0.358 | 1.15 | 0.137 | <T3 |
| N1+ | 3.58 | 1.85 | 6.91 | 0.000148 | N0 |
| Lossness | 1.4 | 0.81 | 2.42 | 0.228 | 0 |
| High Events | 1.34 | 0.694 | 2.59 | 0.383 | Low Events |
| Spearman | 72.1 | 2.97 | 1750 | 0.00855 | 0 |
