# Supplementary material for: Tumour evolvability metrics predict recurrence beyond 10 years in locally-advanced prostate cancer
Source: Research Square preprint supplement (doi:10.21203/rs.3.rs-1520593/v1), 2022-04-05
Supplement: Supplementary file 2 [file 5b80849c3cf52a3b0b7cf602.docx]

| **Table S6: IMRT trial imaging and sequencing cohorts** | | |
| --- | --- | --- |
|  | Imaging Cohort (N=250) | Sequencing Cohort (N=111) |
| T Stage  T1  T2  T3  T4  TX | 9 (3.6%)  69 (27.6%)  167 (66.8%)  4 (1.6%)  1 (0.4%) | 7 (6.3%)  29 (26.1%)  75 (67.6%)  0 (0.0%)  0 (0.0%) |
| N Stage  N0  N1+ | 197 (78.8%)  53 (21.2%) | 88 (79.3%)  23 (20.7%) |
| PSA Level | 19.5 (11.4-41.1) | 25 (12.3-43.2) |
| Gleason Grade Group  (2014 ISUP)  1  2  3  4  5 | 5 (2.0%)  27 (10.8%)  34 (13.6%)  53 (21.2%)  131 (52.4%) | 0 (0.0%)  5 (4.5%)  14 (12.6%)  24 (21.6%)  68 (61.2%) |
| Samples Per Patient | 7 (4-10) | 5 (4-6.75) |
| Patient Outcome  Alive without Recurrence  Alive with Recurrence  Dead without Recurrence  Dead with Recurrence | 95 (38.0%)  77 (30.8%)  43 (17.2%)  35 (14.0%) | 35 (31.5%)  48 (43.2%)  13 (11.7%)  15 (13.5%) |
